# Supplementary material
Source: publisher figshare collection journal article supplement (https://karger.figshare.com/articles/dataset/_/4580887)
Supplement: Supplementary file 1 [file 1]

# **Methotrexate Induces Apoptosis of Post-partum Placental Cytotrophoblast**

Hao Yan<sup>1</sup>, Zhihua Li<sup>1</sup>, Zhonghai Yan<sup>2</sup>, Xiuying Li<sup>1</sup>, Xiaomei Li<sup>1</sup>, Lin Yu<sup>1</sup>, Chunhong Su<sup>1</sup>, Dunjin Chen<sup>1</sup>

<sup>1</sup>Department of Obstetrics and Gynecology, The Third Affiliated Hospital of Guangzhou Medical University, Key Laboratory for Major Obstetric Diseases of Guangdong Province, Guangzhou, China

<sup>2</sup>Division of Nephrology, College of Physicians and Surgeons, Columbia University, New York, NY, United States of America

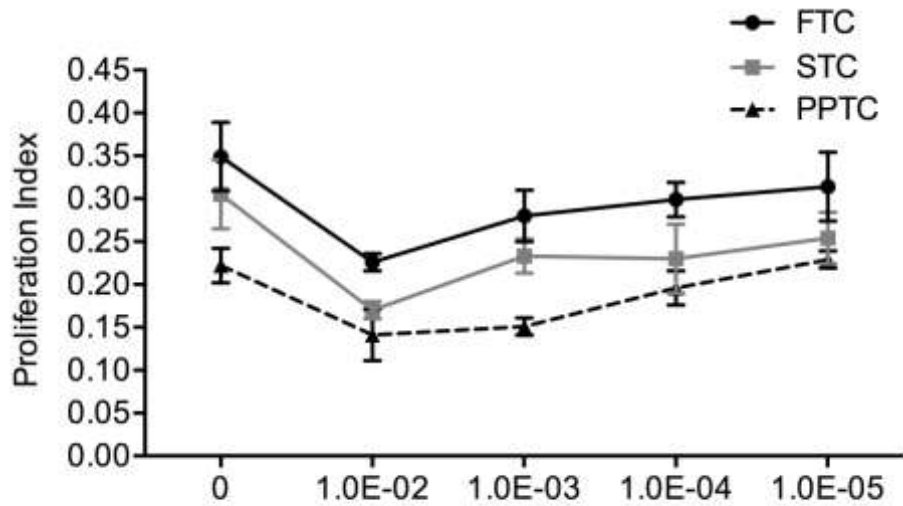

**S1 Fig. Proliferation index of control groups and the groups with MTX treatment**

In the pilot assay, first, second trimester and post-partum placental cytotrophoblast were treated with four different concentrations of MTX ( $10^{-2}$  to  $10^{-5}$  mol/L) for 48 hours. Data showed inhibition of replication in a dose-dependent manner. *MTX*, Methotrexate; *FTC*, first trimester cytotrophoblast; *STC*, Second trimester cytotrophoblast; *PPTC*: Post-partum placental cytotrophoblast.
