# Supplementary material
Source: publisher figshare collection journal article supplement (https://karger.figshare.com/articles/dataset/_/4580887)
Supplement: Supplementary file 2 [file 1]

Archive with 4 entries (4 files):
- CTO452947sm_1.pdf
- CTO452947sm_2.pdf
- CTO452947sm_3.docx
- CTO452947sm_4.docx
