# Supplementary material
Source: publisher figshare collection journal article supplement (https://karger.figshare.com/articles/dataset/_/4580887)
Supplement: Supplementary file 2 [file 1 › CTO452947sm_4.docx]

**Methotrexate Induces Apoptosis of Post-partum Placental Cytotrophoblast**

HaoYan1, Zhihua Li1, Zhonghai Yan2, Xiuying Li1, Xiaomei Li1, Lin Yu1, Chunhong Su1, Dunjin Chen1

1Department of Obstetrics and Gynecology, The Third Affiliated Hospital of Guangzhou Medical University, Key Laboratory for Major Obstetric Diseases of Guangdong Province, Guangzhou, China

2Division of Nephrology, College of Physicians and Surgeons, Columbia University, New York, NY, United States of America

**S2 Table. Antibodies used in Western blotting**

| Protein | Dilution | Company |
| --- | --- | --- |
| Anti-Fas (rabbit IgG) (40-50KDa) | 1:1000 | Cell signalingTechnology (4233) |
| Anti-FasL ( rabbit) (40KDa) | 1:1000 | Cell signalingTechnology (4273) |
| Anti-Bax ( rabbit) (20KDa) | 1:1000 | Cell signalingTechnology (2774) |
| Anti-Bcl-2 (mouse IgG1) (26KDa) | 1:1000 | Cell signalingTechnology (15071) |
| Anti-cleaved caspase 3 (rabbit IgG) (17, 19KDa) | 1:1000 | Cell signalingTechnology (9664) |
| Anti-cleaved caspase 7 (rabbit) (20KDa) | 1:1000 | Cell signaling Technology (9491) |
| Anti-cleaved caspase 8 (mouse IgG1) (10KDa) | 1:1000 | Cell signalingTechnology (9748) |
| Anti-cleaved caspase 9 (rabbit) (35KDa) | 1:1000 | Cell signaling Technology (9505) |
| HRP-goat anti mouse IgG | 1:2500 | Boster (China) (BA1051) |
| HRP-goat anti rabbit IgG | 1:2500 | Boster (China) (BA1055) |
